# Supplementary material
Source: PubMed Central journal article supplement (PMC6461363)
Supplement: NIHMS1524684-supplement-11764_2018_711_MOESM1_ESM.pdf [file NIHMS1524684-supplement-11764_2018_711_MOESM1_ESM.pdf]

**Article Title:** Barriers to Physical Activity: A Study of Academic and Community Cancer Survivors with Pain

**Journal Name:** *Journal of Cancer Survivorship*

**Author Names:** Sally A. D. Romero, PhD, MPH; Justin C. Brown, PhD; Joshua M. Bauml, MD; Jennifer L. Hay, PhD; Q. Susan Li, MS; Roger B. Cohen, MD; Jun J. Mao, MD, MSCE

**Corresponding Author:** Jun J. Mao, MD, MSCE, Memorial Sloan Kettering Cancer Center, Bendheim Integrative Medicine Center, 1429 First Avenue, New York, NY 10021; Email: maoj@mskcc.org

## **ONLINE RESOURCE**

Supplementary Table 1 shows the factor loadings and communalities for the 12-item PABAC scale subjected to principal components analysis (PCA). In support of the factorability of the correlation matrix of the barriers, the Kaiser-Meyer-Olkin value was 0.72, exceeding the recommended value of 0.6[1, 2] and Bartlett's Test of Sphericity[3] reached statistical significance ( $p < 0.001$ ). The PCA with oblimin rotation found four components with eigenvalues exceeding 1.0, explaining a total of 63.1% of the variance. The component with Symptoms (fatigue, pain, treatment side effects, nausea, and sadness) explained 26.5% of the variance; Cognitive barriers (time, motivation, and discipline) explained 15.2% of the variance; Logistical barriers (finances and environment) explained 12.7% of the variance; and the component with Clinical barriers (physician recommendation and surgical complications) explained 8.7% of the variance.

Supplementary Table 1. Principal components analysis pattern and structure matrix of the 12-item Physical Activity Barriers After Cancer scale

| Barriers                                | Component 1<br><i>Symptoms</i> |              | Component 2<br><i>Cognitive</i> |              | Component 3<br><i>Logistical</i> |              | Component 4<br><i>Clinical</i> |              | Communalities | Overall<br>Scale |
|-----------------------------------------|--------------------------------|--------------|---------------------------------|--------------|----------------------------------|--------------|--------------------------------|--------------|---------------|------------------|
|                                         | Component Loadings             |              |                                 |              |                                  |              |                                |              |               |                  |
|                                         | Pattern                        | Structure    | Pattern                         | Structure    | Pattern                          | Structure    | Pattern                        | Structure    |               |                  |
| Fatigue                                 | <b>0.862</b>                   | <b>0.813</b> | 0.085                           | 0.171        | -0.040                           | -0.003       | -0.225                         | -0.014       | 0.718         | --               |
| Pain                                    | <b>0.742</b>                   | <b>0.755</b> | -0.060                          | 0.068        | 0.142                            | 0.204        | 0.035                          | 0.250        | 0.594         | --               |
| Nausea                                  | <b>0.592</b>                   | <b>0.631</b> | -0.012                          | 0.109        | 0.181                            | 0.256        | 0.102                          | 0.293        | 0.449         | --               |
| Treatment side effects                  | <b>0.479</b>                   | <b>0.551</b> | 0.035                           | 0.093        | -0.156                           | -0.026       | 0.324                          | 0.407        | 0.403         | --               |
| Sadness                                 | <b>0.411</b>                   | <b>0.530</b> | 0.203                           | 0.305        | 0.106                            | 0.265        | 0.333                          | 0.478        | 0.467         | --               |
| Difficulty remaining disciplined        | 0.057                          | 0.153        | <b>0.920</b>                    | <b>0.908</b> | -0.067                           | 0.102        | -0.076                         | -0.003       | 0.838         | --               |
| Difficulty getting motivated            | 0.115                          | 0.209        | <b>0.918</b>                    | <b>0.911</b> | -0.080                           | 0.093        | -0.078                         | 0.006        | 0.852         | --               |
| Not enough time/ too busy               | -0.245                         | -0.116       | <b>0.530</b>                    | <b>0.563</b> | 0.269                            | 0.388        | 0.142                          | 0.191        | 0.459         | --               |
| Lack of safe environment to exercise    | 0.024                          | 0.102        | 0.024                           | 0.199        | <b>0.868</b>                     | <b>0.873</b> | -0.008                         | 0.216        | 0.764         | --               |
| Lack of financial resources to exercise | 0.155                          | 0.224        | -0.032                          | 0.156        | <b>0.844</b>                     | <b>0.850</b> | -0.006                         | 0.240        | 0.746         | --               |
| My doctor told me not to exercise       | -0.107                         | 0.091        | -0.074                          | -0.001       | 0.113                            | 0.286        | <b>0.795</b>                   | <b>0.791</b> | 0.651         | --               |
| Surgical complications                  | 0.092                          | 0.279        | 0.001                           | 0.061        | -0.078                           | 0.125        | <b>0.781</b>                   | <b>0.785</b> | 0.629         | --               |
| <b>Cronbach's alpha</b>                 | <b>0.71</b>                    |              | <b>0.72</b>                     |              | <b>0.73</b>                      |              | <b>0.52</b>                    |              |               | <b>0.75</b>      |

Bolded items indicate major loadings for each item and Cronbach's alpha for each scale.

## REFERENCES

1. Kaiser HF. A second generation little jiffy. *Psychometrika*. 1970;35(4):401-15.
2. Kaiser HF. An index of factorial simplicity. *Psychometrika*. 1974;39(1):31-6.
3. Bartlett MS. A note on the multiplying factors for various  $\chi^2$  approximations. *J R Stat Soc Series B Stat Methodol*. 1954:296-8.
